# Supplementary material for: Evidence for a comprehensive approach to Aboriginal tobacco control to maintain the decline in smoking: an overview of reviews among Indigenous peoples
Source: PubMed Central journal article supplement (PMC5504765; doi:10.1186/s13643-017-0520-9), 2017-07-10
Supplement: 13643_2017_520_MOESM7_ESM.pdf [file 13643_2017_520_MOESM7_ESM.pdf]

## Additional file 7: Matrix of references to studies included in reviews included in the Overview

|                                                                            |                                                 |                                                                    | Reviews (number of references to included studies) |                             |                                    |                                   |                               |                               |                                |                                 |                                  |                                               |                                  |                                         |                               |                                   |                                 |                                          | No. of reviews including this study |                                            |                     |                                 |                                   |                                    |  |   |
|----------------------------------------------------------------------------|-------------------------------------------------|--------------------------------------------------------------------|----------------------------------------------------|-----------------------------|------------------------------------|-----------------------------------|-------------------------------|-------------------------------|--------------------------------|---------------------------------|----------------------------------|-----------------------------------------------|----------------------------------|-----------------------------------------|-------------------------------|-----------------------------------|---------------------------------|------------------------------------------|-------------------------------------|--------------------------------------------|---------------------|---------------------------------|-----------------------------------|------------------------------------|--|---|
| ID for reference                                                           | Program name (A-Z)                              |                                                                    | Brusse 2014 JMIR (4)                               | CADTH 2013 Rapid Review (0) | Carson 2012a CDSR (prevention) (2) | Carson 2012b CDSR (cessation) (4) | Carson 2013 Respiriology (6)* | Carson 2015 Respiriology (9)* | Carson 2014 Evidence Base (91) | Clifford 2009 Hlth Prom Int (2) | Clifford 2011 ANZ J Pub Hlth (4) | DiGiacomo 2011 Int J Environ Res Pub Hlth (9) | Gould 2013a Tobacco Control (21) | Gould 2013b Nicotine & Tobacco Cont (7) | Ivers 2003 ANZ J Pub Hlth (4) | Ivers 2011 Closing the Gap (11)** | Ivers 2014 NSW framework (11)** | Johnston 2013 Nicotine & Tobacco Res (5) |                                     | Minichiello 2016 BMC Public Health (85)*** | Passey 2013 MJA (2) | Power 2009 Hlth Prom J Aus (14) | Thompson 2011 ANZ J Pub Hlth (11) | Upton 2014 Rapid Review DoH (31)** |  |   |
| <b>Studies in Australia: Aboriginal and Torres Strait Islander peoples</b> |                                                 |                                                                    |                                                    |                             |                                    |                                   |                               |                               |                                |                                 |                                  |                                               |                                  |                                         |                               |                                   |                                 |                                          |                                     |                                            |                     |                                 |                                   |                                    |  |   |
| 1                                                                          | Finlay 2013                                     | Aboriginal tobacco resistance kit                                  |                                                    |                             |                                    |                                   |                               |                               | 1                              |                                 |                                  |                                               |                                  |                                         |                               |                                   |                                 |                                          |                                     |                                            |                     |                                 |                                   |                                    |  | 1 |
| 2                                                                          | Maddox 2013                                     | ACT Aboriginal and Torres Strait Islander Tobacco Control Strategy |                                                    |                             |                                    |                                   |                               |                               | 1                              |                                 |                                  |                                               |                                  |                                         |                               |                                   |                                 |                                          |                                     |                                            |                     |                                 |                                   |                                    |  | 1 |
| 3                                                                          | Tasmanian Aboriginal Centre Inc 2014            | Alcohol, tobacco and other drugs program                           |                                                    |                             |                                    |                                   |                               |                               | 1                              |                                 |                                  |                                               |                                  |                                         |                               |                                   |                                 |                                          |                                     |                                            |                     |                                 |                                   |                                    |  | 1 |
| 4                                                                          | Shah 2014                                       | Asthma and smoking prevention project                              |                                                    |                             |                                    |                                   |                               |                               | 1                              |                                 |                                  |                                               |                                  |                                         |                               |                                   |                                 |                                          |                                     |                                            |                     |                                 |                                   |                                    |  | 1 |
| 5                                                                          | Lewis 2006                                      | Beyond the big smoke                                               |                                                    |                             |                                    |                                   |                               |                               | 1                              |                                 |                                  |                                               |                                  |                                         |                               |                                   |                                 |                                          |                                     |                                            |                     |                                 |                                   |                                    |  | 1 |
| 6                                                                          | Australian Government Department of Health 2011 | Break the Chain mass media campaign                                |                                                    |                             |                                    |                                   |                               |                               | 1                              |                                 |                                  |                                               |                                  |                                         |                               |                                   |                                 |                                          |                                     | 1                                          |                     |                                 |                                   |                                    |  | 2 |
| 7                                                                          | Boyle 2010                                      | Bubblewrap campaign                                                |                                                    |                             |                                    |                                   |                               |                               |                                |                                 |                                  |                                               | 1                                |                                         |                               |                                   |                                 |                                          |                                     | 1                                          |                     |                                 |                                   |                                    |  | 2 |
| 8                                                                          | Cancer Council Western Australia 2009           | Bubblewrap campaign                                                |                                                    |                             |                                    |                                   |                               |                               |                                |                                 |                                  |                                               |                                  |                                         |                               |                                   | 1                               |                                          |                                     |                                            |                     |                                 |                                   |                                    |  | 1 |
| 9                                                                          | Davison 2014                                    | Butt busters                                                       |                                                    |                             |                                    |                                   |                               |                               | 1                              |                                 |                                  |                                               |                                  |                                         |                               |                                   |                                 |                                          |                                     |                                            |                     |                                 |                                   |                                    |  | 1 |
| 10                                                                         | Young 2007                                      | BUTT OUT                                                           |                                                    |                             |                                    |                                   |                               |                               | 1                              |                                 |                                  |                                               |                                  |                                         |                               |                                   |                                 |                                          | 1                                   |                                            | 1                   |                                 |                                   |                                    |  | 3 |
| 11                                                                         | Drug and Alcohol Services South Australia 2014  | Ceduna Day Centre                                                  |                                                    |                             |                                    |                                   |                               |                               | 1                              |                                 |                                  |                                               |                                  |                                         |                               |                                   |                                 |                                          |                                     |                                            |                     |                                 |                                   |                                    |  | 1 |
| 12                                                                         | Sarin 2014                                      | Clean air dreaming                                                 |                                                    |                             |                                    |                                   |                               |                               | 1                              |                                 |                                  |                                               |                                  |                                         |                               |                                   |                                 |                                          |                                     |                                            |                     |                                 |                                   |                                    |  | 1 |
| 13                                                                         | Clifford 2014                                   | Deadly choices                                                     |                                                    |                             |                                    |                                   |                               |                               |                                |                                 |                                  |                                               |                                  |                                         |                               |                                   |                                 |                                          |                                     |                                            |                     |                                 |                                   | 1                                  |  | 1 |
| 14†                                                                        | Institute for Urban Indigenous Health 2014      | Deadly choices                                                     |                                                    |                             |                                    |                                   |                               |                               |                                |                                 |                                  |                                               |                                  |                                         |                               |                                   |                                 |                                          |                                     | 1                                          |                     |                                 |                                   | 1                                  |  | 2 |
| 15                                                                         | Malseed 2014a                                   | Deadly choices                                                     |                                                    |                             |                                    |                                   |                               |                               |                                |                                 |                                  |                                               |                                  |                                         |                               |                                   |                                 |                                          |                                     | 1                                          |                     |                                 |                                   |                                    |  | 1 |
| 16                                                                         | Malseed 2014b                                   | Deadly choices                                                     |                                                    |                             |                                    |                                   |                               |                               |                                |                                 |                                  |                                               |                                  |                                         |                               |                                   |                                 |                                          |                                     |                                            |                     |                                 |                                   | 1                                  |  | 1 |
| 17                                                                         | Malseed 2013                                    | Deadly choices                                                     |                                                    |                             |                                    |                                   |                               |                               |                                |                                 |                                  |                                               |                                  |                                         |                               |                                   |                                 |                                          |                                     | 1                                          |                     |                                 |                                   |                                    |  | 1 |





|                  |                                |                                                        | Reviews (number of references to included studies) |                                |                                       |                                      |                                 |                                 |                                   |                                    |                                     |                                                  |                                     |                                            |                                  |                                     |                                    |                                             |                                              |                       |                                    |                                      |                                       |                                     |    |
|------------------|--------------------------------|--------------------------------------------------------|----------------------------------------------------|--------------------------------|---------------------------------------|--------------------------------------|---------------------------------|---------------------------------|-----------------------------------|------------------------------------|-------------------------------------|--------------------------------------------------|-------------------------------------|--------------------------------------------|----------------------------------|-------------------------------------|------------------------------------|---------------------------------------------|----------------------------------------------|-----------------------|------------------------------------|--------------------------------------|---------------------------------------|-------------------------------------|----|
| ID for reference | Program name (A-Z)             |                                                        | Brusse 2014<br>JMIR (4)                            | CADTH 2013<br>Rapid Review (0) | Carson 2012a<br>CDSR (prevention) (2) | Carson 2012b<br>CDSR (cessation) (4) | Carson 2013<br>Respirology (6)* | Carson 2015<br>Respirology (9)* | Carson 2014<br>Evidence Base (91) | Clifford 2009<br>Hlth Prom Int (2) | Clifford 2011<br>ANZ J Pub Hlth (4) | DiGiacomo 2011<br>Int J Environ Res Pub Hlth (9) | Gould 2013a<br>Tobacco Control (21) | Gould 2013b<br>Nicotine & Tobacco Cont (7) | Ivers 2003<br>ANZ J Pub Hlth (4) | Ivers 2011<br>Closing the Gap (1)** | Ivers 2014<br>NSW framework (11)** | Johnston 2013<br>Nicotine & Tobacco Res (5) | Minichello 2016<br>BMC Public Health (85)*** | Passy 2013<br>MJA (2) | Power 2009<br>Hlth Prom J Aus (14) | Thompson 2011<br>ANZ J Pub Hlth (11) | Upton 2014<br>Rapid Review DoH (31)** | No. of reviews including this study |    |
| 46               | Ell 2013                       | National Tobacco Campaign                              |                                                    |                                |                                       |                                      |                                 |                                 |                                   |                                    |                                     |                                                  |                                     |                                            |                                  |                                     |                                    |                                             |                                              |                       |                                    |                                      | 1                                     | 1                                   |    |
| 47               | National Tobacco Campaign 1999 | National Tobacco Campaign                              |                                                    |                                |                                       |                                      |                                 |                                 |                                   |                                    |                                     |                                                  |                                     |                                            | 1                                |                                     |                                    |                                             |                                              |                       |                                    |                                      |                                       |                                     | 1  |
| 48               | ORIMA 2013                     | National Tobacco Campaign (Quit for You, Quit for Two) |                                                    |                                |                                       |                                      |                                 |                                 |                                   |                                    |                                     |                                                  |                                     |                                            |                                  |                                     |                                    |                                             |                                              |                       |                                    |                                      | 1                                     | 1                                   |    |
| 49†              | Adams 2005                     | No more Bundah, Winnunga Nimmityjah,                   |                                                    |                                |                                       |                                      |                                 |                                 |                                   |                                    |                                     |                                                  |                                     |                                            |                                  |                                     |                                    |                                             | 1                                            |                       |                                    |                                      |                                       |                                     | 1  |
| 50               | Webb 2014                      | No more Bundah, Winnunga Nimmityjah,                   |                                                    |                                |                                       |                                      |                                 |                                 | 1                                 |                                    |                                     |                                                  |                                     |                                            |                                  |                                     |                                    |                                             |                                              |                       |                                    |                                      |                                       |                                     | 1  |
| 51               | Bell 2012                      | No Smokes Project                                      |                                                    |                                |                                       |                                      |                                 |                                 |                                   |                                    |                                     |                                                  |                                     |                                            |                                  |                                     |                                    |                                             | 1                                            |                       |                                    |                                      |                                       |                                     | 1  |
| 52               | Gould 2010                     | No Smokes Project, North coast                         |                                                    |                                |                                       |                                      |                                 |                                 | 1                                 |                                    |                                     |                                                  |                                     |                                            |                                  |                                     |                                    |                                             |                                              |                       |                                    |                                      |                                       |                                     | 1  |
| 53               | Adams 2006                     | Not reported in review                                 |                                                    |                                |                                       |                                      |                                 |                                 |                                   |                                    |                                     |                                                  |                                     |                                            |                                  |                                     |                                    |                                             |                                              |                       |                                    |                                      | 1                                     |                                     | 1  |
| 54               | Andrews 1997                   | Not reported in review                                 |                                                    |                                |                                       |                                      |                                 |                                 |                                   |                                    |                                     |                                                  |                                     |                                            |                                  |                                     |                                    |                                             |                                              |                       |                                    |                                      | 1                                     |                                     | 1  |
| 55               | Bardsley 1999                  | Not reported in review                                 |                                                    |                                |                                       |                                      |                                 |                                 |                                   |                                    |                                     |                                                  |                                     |                                            |                                  | 1                                   |                                    |                                             |                                              |                       |                                    |                                      |                                       |                                     | 1  |
| 56               | DiGiacomo 2007                 | Not reported in review                                 |                                                    |                                |                                       |                                      |                                 |                                 | 1                                 |                                    |                                     | 1                                                |                                     |                                            |                                  |                                     |                                    |                                             | 1                                            |                       | 1                                  | 1                                    | 1                                     |                                     | 6  |
| 57               | Douglas 2001                   | Not reported in review                                 |                                                    |                                |                                       |                                      |                                 |                                 |                                   |                                    |                                     |                                                  |                                     | 1                                          |                                  |                                     |                                    |                                             |                                              |                       |                                    |                                      |                                       |                                     | 1  |
| 58               | Eades 2012                     | Not reported in review                                 |                                                    |                                |                                       |                                      |                                 |                                 | 1                                 |                                    |                                     |                                                  |                                     |                                            |                                  |                                     | 1                                  |                                             | 1                                            | 1                     |                                    |                                      |                                       | 1                                   | 5  |
| 59               | Fairer Health Victoria 2009    | Not reported in review                                 |                                                    |                                |                                       |                                      |                                 |                                 |                                   |                                    |                                     |                                                  |                                     |                                            |                                  |                                     |                                    |                                             |                                              |                       |                                    |                                      | 1                                     |                                     | 1  |
| 60               | Fletcher 2011                  | Not reported in review                                 |                                                    |                                |                                       |                                      |                                 |                                 |                                   |                                    |                                     |                                                  |                                     |                                            |                                  |                                     |                                    |                                             |                                              |                       |                                    |                                      | 1                                     |                                     | 1  |
| 61               | Gilligan 2009                  | Not reported in review                                 |                                                    |                                |                                       |                                      |                                 |                                 |                                   |                                    |                                     |                                                  |                                     | 1                                          |                                  |                                     |                                    |                                             |                                              |                       |                                    |                                      |                                       |                                     | 1  |
| 62               | Gilligan 2008                  | Not reported in review                                 |                                                    |                                |                                       |                                      |                                 |                                 |                                   |                                    |                                     |                                                  |                                     |                                            |                                  |                                     |                                    |                                             | 1                                            |                       |                                    |                                      |                                       |                                     | 1  |
| 63               | Gray 2002                      | Not reported in review                                 |                                                    |                                |                                       |                                      |                                 |                                 |                                   |                                    |                                     |                                                  |                                     |                                            |                                  |                                     |                                    |                                             |                                              |                       | 1                                  |                                      | 1                                     |                                     | 2  |
| 64               | Heath 2006                     | Not reported in review                                 |                                                    |                                |                                       |                                      |                                 |                                 |                                   |                                    |                                     |                                                  |                                     | 1                                          |                                  |                                     |                                    |                                             |                                              |                       | 1                                  |                                      |                                       |                                     | 1  |
| 65               | Ivers 2003                     | Not reported in review                                 |                                                    |                                | 1                                     |                                      | 1                               | 1                               |                                   | 1                                  | 1                                   |                                                  |                                     |                                            |                                  | 1                                   | 1                                  |                                             | 1                                            |                       | 1                                  |                                      | 1                                     |                                     | 10 |
| 66               | Johnston 2008                  | Not reported in review                                 |                                                    |                                |                                       |                                      |                                 |                                 |                                   |                                    |                                     |                                                  |                                     | 1                                          |                                  |                                     |                                    |                                             | 1                                            |                       | 1                                  |                                      |                                       |                                     | 2  |
| 67               | Johnston 2010                  | Not reported in review                                 |                                                    |                                |                                       |                                      |                                 |                                 |                                   |                                    |                                     |                                                  | 1                                   |                                            |                                  | 1                                   |                                    |                                             |                                              |                       |                                    |                                      | 1                                     |                                     | 3  |
| 68               | Lindorff 2002                  | Not reported in review                                 |                                                    |                                |                                       |                                      |                                 |                                 |                                   |                                    |                                     |                                                  |                                     |                                            |                                  |                                     |                                    |                                             |                                              |                       |                                    | 1                                    |                                       |                                     | 1  |
| 69               | Panaretto 2010                 | Not reported in review                                 |                                                    |                                |                                       |                                      |                                 |                                 |                                   |                                    |                                     |                                                  |                                     |                                            |                                  |                                     |                                    |                                             |                                              |                       |                                    |                                      | 1                                     |                                     | 1  |







|                                                                                                            |                                  |                                                                         | Reviews (number of references to included studies) |                                |                                       |                                      |                                 |                                 |                                   |                                    |                                     |                                                  |                                     |                                            |                                  |                                     |                                   |                                             |                                               |                       |                                    |                                      |                                       |                                     |   |  |
|------------------------------------------------------------------------------------------------------------|----------------------------------|-------------------------------------------------------------------------|----------------------------------------------------|--------------------------------|---------------------------------------|--------------------------------------|---------------------------------|---------------------------------|-----------------------------------|------------------------------------|-------------------------------------|--------------------------------------------------|-------------------------------------|--------------------------------------------|----------------------------------|-------------------------------------|-----------------------------------|---------------------------------------------|-----------------------------------------------|-----------------------|------------------------------------|--------------------------------------|---------------------------------------|-------------------------------------|---|--|
| ID for reference                                                                                           | Program name (A-Z)               |                                                                         | Brusse 2014<br>JMIR (4)                            | CADTH 2013<br>Rapid Review (0) | Carson 2012a<br>CDSR (prevention) (2) | Carson 2012b<br>CDSR (cessation) (4) | Carson 2013<br>Respirology (6)* | Carson 2015<br>Respirology (9)* | Carson 2014<br>Evidence Base (91) | Clifford 2009<br>Hlth Prom Int (2) | Clifford 2011<br>ANZ J Pub Hlth (4) | DiGiacomo 2011<br>Int J Environ Res Pub Hlth (9) | Gould 2013a<br>Tobacco Control (21) | Gould 2013b<br>Nicotine & Tobacco Cont (7) | Ivers 2003<br>ANZ J Pub Hlth (4) | Ivers 2011<br>Closing the Gap (1)** | Ivers 2014<br>NSW framework (1)** | Johnston 2013<br>Nicotine & Tobacco Res (5) | Minichiello 2016<br>BMC Public Health (85)*** | Passy 2013<br>MJA (2) | Power 2009<br>Hlth Prom J Aus (14) | Thompson 2011<br>ANZ J Pub Hlth (11) | Upton 2014<br>Rapid Review DoH (31)** | No. of reviews including this study |   |  |
| 117                                                                                                        | Robertson 2013                   | Top End Tobacco Project                                                 |                                                    |                                |                                       |                                      |                                 |                                 |                                   |                                    |                                     |                                                  |                                     |                                            |                                  |                                     |                                   |                                             |                                               | 1                     |                                    |                                      |                                       | 1                                   | 2 |  |
| 118†                                                                                                       | Robertson 2007a                  | Top End Tobacco Project                                                 |                                                    |                                |                                       |                                      |                                 |                                 | 1                                 |                                    |                                     |                                                  |                                     |                                            |                                  |                                     |                                   |                                             |                                               |                       |                                    |                                      |                                       |                                     | 1 |  |
| 119                                                                                                        | Robertson 2007b                  | Top End Tobacco Project                                                 |                                                    |                                |                                       |                                      |                                 |                                 |                                   |                                    |                                     |                                                  |                                     |                                            |                                  |                                     |                                   |                                             |                                               |                       |                                    | 1                                    |                                       |                                     | 1 |  |
| 120                                                                                                        | Government of Victoria 2014      | Victorian Closing the Gap in Health Outcomes Initiative                 |                                                    |                                |                                       |                                      |                                 |                                 |                                   |                                    |                                     |                                                  |                                     |                                            |                                  |                                     |                                   |                                             |                                               | 1                     |                                    |                                      |                                       |                                     | 1 |  |
| 121                                                                                                        | Read 2012                        | WA prisons smoking reduction plan                                       |                                                    |                                |                                       |                                      |                                 |                                 | 1                                 |                                    |                                     |                                                  |                                     |                                            |                                  |                                     |                                   |                                             |                                               |                       |                                    |                                      |                                       |                                     | 1 |  |
| 122                                                                                                        | Davis 2013                       | Yarning it up                                                           |                                                    |                                |                                       |                                      |                                 |                                 | 1                                 |                                    |                                     |                                                  |                                     |                                            |                                  |                                     |                                   |                                             |                                               |                       |                                    |                                      |                                       |                                     | 1 |  |
| 123                                                                                                        | Ramamoorthi 2009                 | Healthy starts (Te Piripohotanga)                                       |                                                    |                                |                                       |                                      |                                 |                                 | 1                                 |                                    |                                     |                                                  |                                     |                                            |                                  |                                     |                                   |                                             |                                               |                       |                                    |                                      |                                       |                                     | 1 |  |
| 124                                                                                                        | Walker 2015                      | Not reported in review                                                  |                                                    |                                |                                       |                                      |                                 |                                 |                                   |                                    |                                     |                                                  |                                     |                                            |                                  |                                     |                                   |                                             |                                               | 1                     |                                    |                                      |                                       |                                     | 1 |  |
| <b>Studies in Canada: Aboriginal/First Nations people, Métis people, Inuit people, "non-status people"</b> |                                  |                                                                         |                                                    |                                |                                       |                                      |                                 |                                 |                                   |                                    |                                     |                                                  |                                     |                                            |                                  |                                     |                                   |                                             |                                               |                       |                                    |                                      |                                       |                                     |   |  |
| 1                                                                                                          | Mashford-Pringle 2012            | Aboriginal Head Start Urban and Northern Communities Program            |                                                    |                                |                                       |                                      |                                 |                                 |                                   |                                    |                                     |                                                  |                                     |                                            |                                  |                                     |                                   |                                             |                                               | 1                     |                                    |                                      |                                       |                                     | 1 |  |
| 2                                                                                                          | Mashford-Pringle 2008            | Aboriginal Head Start Urban and Northern Communities Program            |                                                    |                                |                                       |                                      |                                 |                                 |                                   |                                    |                                     |                                                  |                                     |                                            |                                  |                                     |                                   |                                             |                                               | 1                     |                                    |                                      |                                       |                                     | 1 |  |
| 3                                                                                                          | Mitchell 2007                    | Aniqaattiarniq – Breathing Easy                                         |                                                    |                                |                                       |                                      |                                 |                                 |                                   |                                    |                                     |                                                  |                                     |                                            |                                  |                                     |                                   |                                             |                                               | 1                     |                                    |                                      |                                       |                                     | 1 |  |
| 4†                                                                                                         | Aboriginal Cancer Care Unit 2008 | Anishnawbe Mushkiki – Sema Kenjigewin Aboriginal Tobacco Misuse Program |                                                    |                                |                                       |                                      |                                 |                                 |                                   |                                    |                                     |                                                  |                                     |                                            |                                  |                                     |                                   |                                             |                                               | 1                     |                                    |                                      |                                       |                                     | 1 |  |
| 5                                                                                                          | Inuit Tapiriit Kanatami 2011     | Blue Light Campaign                                                     |                                                    |                                |                                       |                                      |                                 |                                 |                                   |                                    |                                     |                                                  |                                     |                                            |                                  |                                     |                                   |                                             |                                               | 1                     |                                    |                                      |                                       |                                     | 1 |  |
| 6                                                                                                          | Hayward 2007                     | Canadian Quitlines                                                      |                                                    |                                |                                       |                                      |                                 |                                 | 1                                 |                                    |                                     | 1                                                |                                     |                                            |                                  |                                     |                                   |                                             |                                               | 1                     |                                    |                                      |                                       |                                     | 3 |  |



|                  |                                  |                                                                                                       | Reviews (number of references to included studies) |                                |                                       |                                      |                                 |                                 |                                   |                                    |                                     |                                                  |                                     |                                            |                                  |                                     |                                   |                                             |                                              |                       |                                    |                                      |                                       |                                     |   |
|------------------|----------------------------------|-------------------------------------------------------------------------------------------------------|----------------------------------------------------|--------------------------------|---------------------------------------|--------------------------------------|---------------------------------|---------------------------------|-----------------------------------|------------------------------------|-------------------------------------|--------------------------------------------------|-------------------------------------|--------------------------------------------|----------------------------------|-------------------------------------|-----------------------------------|---------------------------------------------|----------------------------------------------|-----------------------|------------------------------------|--------------------------------------|---------------------------------------|-------------------------------------|---|
| ID for reference | Program name (A-Z)               |                                                                                                       | Brusse 2014<br>JMIR (4)                            | CADTH 2013<br>Rapid Review (0) | Carson 2012a<br>CDSR (prevention) (2) | Carson 2012b<br>CDSR (cessation) (4) | Carson 2013<br>Respirology (6)* | Carson 2015<br>Respirology (9)* | Carson 2014<br>Evidence Base (91) | Clifford 2009<br>Hlth Prom Int (2) | Clifford 2011<br>ANZ J Pub Hlth (4) | DiGiacomo 2011<br>Int J Environ Res Pub Hlth (9) | Gould 2013a<br>Tobacco Control (21) | Gould 2013b<br>Nicotine & Tobacco Cont (7) | Ivers 2003<br>ANZ J Pub Hlth (4) | Ivers 2011<br>Closing the Gap (1)** | Ivers 2014<br>NSW framework (1)** | Johnston 2013<br>Nicotine & Tobacco Res (5) | Minichello 2016<br>BMC Public Health (85)*** | Passy 2013<br>MJA (2) | Power 2009<br>Hlth Prom J Aus (14) | Thompson 2011<br>ANZ J Pub Hlth (11) | Upton 2014<br>Rapid Review DoH (31)** | No. of reviews including this study |   |
| 7†               | Wesche 2011                      | Changing the Culture of Smoking – A Community-Based Participatory Research Project, Inuvialuit Region |                                                    |                                |                                       |                                      |                                 |                                 |                                   |                                    |                                     |                                                  |                                     |                                            |                                  |                                     |                                   |                                             |                                              | 1                     |                                    |                                      |                                       |                                     | 1 |
| 8                | Baydala 2009                     | Life skills training (LST) program                                                                    |                                                    |                                |                                       |                                      |                                 |                                 | 1                                 |                                    |                                     |                                                  |                                     |                                            |                                  |                                     |                                   |                                             |                                              |                       |                                    |                                      |                                       |                                     | 1 |
| 9                | Irfan 2012                       | Making Aboriginal Kids Walk Away (From Tobacco Abuse) (MAKWA)                                         |                                                    |                                |                                       |                                      |                                 |                                 |                                   |                                    |                                     |                                                  |                                     |                                            |                                  |                                     |                                   |                                             |                                              | 1                     |                                    |                                      |                                       |                                     | 1 |
| 10†              | Wesche 2011                      | Métis Nation British Columbia's Aboriginal ActNow BC Program                                          |                                                    |                                |                                       |                                      |                                 |                                 |                                   |                                    |                                     |                                                  |                                     |                                            |                                  |                                     |                                   |                                             |                                              | 1                     |                                    |                                      |                                       |                                     | 1 |
| 11               | McKennitt 2012                   | Not reported in review                                                                                |                                                    |                                |                                       |                                      |                                 |                                 | 1                                 |                                    |                                     |                                                  |                                     |                                            |                                  |                                     |                                   |                                             |                                              | 1                     |                                    |                                      |                                       |                                     | 2 |
| 12†              | Wesche 2011                      | Peterborough County-City Health's "Choose to be SmokeFree" Tobacco Cessation Program                  |                                                    |                                |                                       |                                      |                                 |                                 |                                   |                                    |                                     |                                                  |                                     |                                            |                                  |                                     |                                   |                                             |                                              | 1                     |                                    |                                      |                                       |                                     | 1 |
| 13†              | Aboriginal Cancer Care Unit 2008 | Sacred smoke                                                                                          |                                                    |                                |                                       |                                      |                                 |                                 |                                   |                                    |                                     |                                                  |                                     |                                            |                                  |                                     |                                   |                                             |                                              | 1                     |                                    |                                      |                                       |                                     | 1 |
| 14               | Chansonneuve 2007                | Sacred smoke                                                                                          |                                                    |                                |                                       |                                      |                                 |                                 |                                   |                                    |                                     |                                                  |                                     |                                            |                                  |                                     |                                   |                                             |                                              | 1                     |                                    |                                      |                                       |                                     | 1 |
| 15               | Inuit Tobacco Free Network 2011  | Smoke Stories: Quit Clips by Inuit Youth — Video Screening Contest                                    |                                                    |                                |                                       |                                      |                                 |                                 |                                   |                                    |                                     |                                                  |                                     |                                            |                                  |                                     |                                   |                                             |                                              | 1                     |                                    |                                      |                                       |                                     | 1 |
| 16†              | Wesche 2011                      | Stay Quit to Win Challenge – Tobacco Control, Nunavik                                                 |                                                    |                                |                                       |                                      |                                 |                                 |                                   |                                    |                                     |                                                  |                                     |                                            |                                  |                                     |                                   |                                             |                                              | 1                     |                                    |                                      |                                       |                                     | 1 |
| 17               | Irfan 2012                       | Youth Action Alliance of Manitoulin Island                                                            |                                                    |                                |                                       |                                      |                                 |                                 |                                   |                                    |                                     |                                                  |                                     |                                            |                                  |                                     |                                   |                                             |                                              | 1                     |                                    |                                      |                                       |                                     | 1 |



|                                                                                                                                                            |                    |                                                                          | Reviews (number of references to included studies) |                                |                                       |                                      |                                 |                                 |                                   |                                    |                                     |                                                  |                                     |                                            |                                  |                                     |                                    |                                             |                                               |                       |                                    |                                      |                                       |                                     |   |  |
|------------------------------------------------------------------------------------------------------------------------------------------------------------|--------------------|--------------------------------------------------------------------------|----------------------------------------------------|--------------------------------|---------------------------------------|--------------------------------------|---------------------------------|---------------------------------|-----------------------------------|------------------------------------|-------------------------------------|--------------------------------------------------|-------------------------------------|--------------------------------------------|----------------------------------|-------------------------------------|------------------------------------|---------------------------------------------|-----------------------------------------------|-----------------------|------------------------------------|--------------------------------------|---------------------------------------|-------------------------------------|---|--|
| ID for reference                                                                                                                                           | Program name (A-Z) |                                                                          | Brusse 2014<br>JMIR (4)                            | CADTH 2013<br>Rapid Review (0) | Carson 2012a<br>CDSR (prevention) (2) | Carson 2012b<br>CDSR (cessation) (4) | Carson 2013<br>Respirology (6)* | Carson 2015<br>Respirology (9)* | Carson 2014<br>Evidence Base (91) | Clifford 2009<br>Hlth Prom Int (2) | Clifford 2011<br>ANZ J Pub Hlth (4) | DiGiacomo 2011<br>Int J Environ Res Pub Hlth (9) | Gould 2013a<br>Tobacco Control (21) | Gould 2013b<br>Nicotine & Tobacco Cont (7) | Ivers 2003<br>ANZ J Pub Hlth (4) | Ivers 2011<br>Closing the Gap (1)** | Ivers 2014<br>NSW framework (11)** | Johnston 2013<br>Nicotine & Tobacco Res (5) | Minichiello 2016<br>BMC Public Health (85)*** | Passy 2013<br>MJA (2) | Power 2009<br>Hlth Prom J Aus (14) | Thompson 2011<br>ANZ J Pub Hlth (11) | Upton 2014<br>Rapid Review DoH (31)** | No. of reviews including this study |   |  |
| 15                                                                                                                                                         | Hiscock 2009       | PEGS: Preparation, Education, Giving up and Staying Smoke Free Programme |                                                    |                                |                                       |                                      |                                 |                                 |                                   |                                    |                                     |                                                  |                                     |                                            |                                  |                                     |                                    |                                             |                                               | 1                     |                                    |                                      |                                       |                                     | 1 |  |
| 16                                                                                                                                                         | Walker 012         | Quitline NZ plus very low nicotine cigarettes                            |                                                    |                                |                                       |                                      |                                 |                                 | 1                                 |                                    |                                     |                                                  |                                     |                                            |                                  |                                     |                                    | 1                                           |                                               |                       |                                    |                                      |                                       |                                     | 2 |  |
| 17                                                                                                                                                         | Bramley 2005       | STOMP: Stop Smoking by Mobile Phone                                      | 1                                                  |                                |                                       | 1                                    |                                 | 1                               | 1                                 |                                    |                                     |                                                  | 1                                   |                                            |                                  |                                     |                                    |                                             | 1                                             | 1                     |                                    |                                      |                                       |                                     | 7 |  |
| 18                                                                                                                                                         | Rogers 2005        | STOMP: Stop Smoking by Mobile Phone                                      | 1                                                  |                                |                                       |                                      |                                 |                                 |                                   |                                    |                                     |                                                  |                                     |                                            |                                  |                                     |                                    |                                             |                                               |                       |                                    |                                      |                                       |                                     | 1 |  |
| 19                                                                                                                                                         | Glover 2014        | WERO study                                                               |                                                    |                                |                                       |                                      |                                 |                                 | 1                                 |                                    |                                     |                                                  |                                     |                                            |                                  |                                     |                                    |                                             |                                               |                       |                                    |                                      |                                       |                                     | 1 |  |
| <b>Studies in Taiwan</b>                                                                                                                                   |                    |                                                                          |                                                    |                                |                                       |                                      |                                 |                                 |                                   |                                    |                                     |                                                  |                                     |                                            |                                  |                                     |                                    |                                             |                                               |                       |                                    |                                      |                                       |                                     |   |  |
| 1                                                                                                                                                          | Lin 2013           | Not reported in review                                                   |                                                    |                                |                                       |                                      |                                 |                                 |                                   |                                    |                                     |                                                  |                                     |                                            |                                  |                                     |                                    |                                             |                                               | 1                     |                                    |                                      |                                       |                                     | 1 |  |
| <b>Studies in the USA: Alaska Native, American Indian people, Native American people, Yup'ik people, Cup'ik people, Native Hawaiian, Pacific Islanders</b> |                    |                                                                          |                                                    |                                |                                       |                                      |                                 |                                 |                                   |                                    |                                     |                                                  |                                     |                                            |                                  |                                     |                                    |                                             |                                               |                       |                                    |                                      |                                       |                                     |   |  |
| 1                                                                                                                                                          | Patten 2010        | Alaska Native Pregnant Women intervention                                |                                                    |                                |                                       |                                      |                                 |                                 | 1                                 |                                    |                                     |                                                  | 1                                   |                                            |                                  |                                     |                                    |                                             |                                               | 1                     | 1                                  |                                      |                                       |                                     | 4 |  |
| 2                                                                                                                                                          | Patten 2012        | Alaska Native Pregnant Women intervention                                |                                                    |                                |                                       |                                      |                                 |                                 |                                   |                                    |                                     |                                                  | 0                                   |                                            |                                  |                                     |                                    |                                             |                                               | 1                     |                                    |                                      |                                       |                                     | 1 |  |
| 3                                                                                                                                                          | Boles 2009         | Alaska Quitline                                                          |                                                    |                                |                                       |                                      |                                 |                                 | 1                                 |                                    | 1                                   |                                                  |                                     |                                            |                                  |                                     |                                    |                                             |                                               | 1                     |                                    |                                      |                                       |                                     | 3 |  |
| 4                                                                                                                                                          | Choi 2011          | All Nations Breath of Life                                               |                                                    |                                |                                       |                                      |                                 |                                 | 1                                 |                                    |                                     |                                                  | 0                                   |                                            |                                  |                                     |                                    |                                             |                                               |                       |                                    |                                      |                                       |                                     | 1 |  |
| 5                                                                                                                                                          | Daley 2009         | All Nations Breath of Life                                               |                                                    |                                |                                       |                                      |                                 |                                 |                                   |                                    |                                     |                                                  | 1                                   |                                            |                                  |                                     |                                    |                                             |                                               |                       |                                    |                                      |                                       |                                     | 1 |  |
| 6                                                                                                                                                          | Makosky 2010       | All Nations Breath of Life                                               |                                                    |                                |                                       |                                      |                                 |                                 | 1                                 |                                    |                                     |                                                  |                                     |                                            |                                  |                                     |                                    |                                             |                                               | 1                     |                                    |                                      |                                       |                                     | 2 |  |
| 7                                                                                                                                                          | Horn 2005          | American Indian Not on Tobacco (N-O-T) program                           |                                                    |                                |                                       |                                      |                                 |                                 | 1                                 |                                    |                                     |                                                  |                                     |                                            |                                  |                                     |                                    |                                             |                                               | 1                     |                                    |                                      |                                       |                                     | 2 |  |
| 8                                                                                                                                                          | Nadeau 2012        | Circles of Tobacco Wisdom                                                |                                                    |                                |                                       |                                      |                                 |                                 |                                   |                                    |                                     |                                                  |                                     |                                            |                                  |                                     |                                    |                                             |                                               | 1                     |                                    |                                      |                                       |                                     | 1 |  |
| 9                                                                                                                                                          | Schinke 1996       | FACETS curriculum                                                        |                                                    |                                | 1                                     |                                      | 1                               |                                 |                                   |                                    |                                     |                                                  |                                     |                                            |                                  |                                     |                                    |                                             |                                               | 1                     |                                    |                                      |                                       |                                     | 3 |  |



|                  |                    |                                                                            | Reviews (number of references to included studies) |                             |                                    |                                   |                               |                               |                                |                                 |                                  |                                               |                                  |                                         |                               |                                  |                                |                                          |                                           | No. of reviews including this study |                     |                                 |                                   |                                    |   |
|------------------|--------------------|----------------------------------------------------------------------------|----------------------------------------------------|-----------------------------|------------------------------------|-----------------------------------|-------------------------------|-------------------------------|--------------------------------|---------------------------------|----------------------------------|-----------------------------------------------|----------------------------------|-----------------------------------------|-------------------------------|----------------------------------|--------------------------------|------------------------------------------|-------------------------------------------|-------------------------------------|---------------------|---------------------------------|-----------------------------------|------------------------------------|---|
| ID for reference | Program name (A-Z) |                                                                            | Brusse 2014 JMIR (4)                               | CADTH 2013 Rapid Review (0) | Carson 2012a CDSR (prevention) (2) | Carson 2012b CDSR (cessation) (4) | Carson 2013 Respiriology (6)* | Carson 2015 Respiriology (9)* | Carson 2014 Evidence Base (9)† | Clifford 2009 Hlth Prom Int (2) | Clifford 2011 ANZ J Pub Hlth (4) | DiGiacomo 2011 Int J Environ Res Pub Hlth (9) | Gould 2013a Tobacco Control (2)† | Gould 2013b Nicotine & Tobacco Cont (7) | Ivers 2003 ANZ J Pub Hlth (4) | Ivers 2011 Closing the Gap (1)** | Ivers 2014 NSW framework (1)** | Johnston 2013 Nicotine & Tobacco Res (5) | Minichello 2016 BMC Public Health (85)*** |                                     | Passey 2013 MJA (2) | Power 2009 Hlth Prom J Aus (14) | Thompson 2011 ANZ J Pub Hlth (11) | Upton 2014 Rapid Review DoH (31)** |   |
| 34               | Daley 2006         | Second wind                                                                |                                                    |                             |                                    |                                   |                               |                               |                                |                                 |                                  |                                               | 1                                |                                         |                               |                                  |                                |                                          |                                           |                                     |                     |                                 |                                   |                                    | 1 |
| 35               | Bowen2012          | SmokingZine website                                                        |                                                    |                             |                                    |                                   |                               |                               |                                |                                 |                                  |                                               |                                  |                                         |                               |                                  |                                |                                          |                                           | 1                                   |                     |                                 |                                   |                                    | 1 |
| 36               | Farmer 2014        | Sonoma County Indian Health Project (SCIHP)                                |                                                    |                             |                                    |                                   |                               |                               |                                |                                 |                                  |                                               |                                  |                                         |                               |                                  |                                |                                          |                                           | 1                                   |                     |                                 |                                   |                                    | 1 |
| 37               | Fenn 2007          | Southcentral Foundation Tobacco Cessation Initiative                       |                                                    |                             |                                    |                                   |                               |                               |                                |                                 |                                  |                                               |                                  |                                         |                               |                                  |                                |                                          |                                           | 1                                   |                     |                                 |                                   |                                    | 1 |
| 38               | Davis 1995         | Southwest Cardiovascular Curriculum                                        |                                                    |                             |                                    |                                   |                               |                               | 1                              |                                 |                                  |                                               |                                  |                                         |                               |                                  |                                |                                          |                                           |                                     |                     |                                 |                                   |                                    | 1 |
| 39               | Schinke 1994       | The Boy and Woman Bear                                                     |                                                    |                             |                                    |                                   |                               |                               |                                |                                 |                                  |                                               |                                  |                                         |                               |                                  |                                |                                          |                                           | 1                                   |                     |                                 |                                   |                                    | 1 |
| 40               | Johnson 2009       | Think Smart                                                                |                                                    |                             |                                    |                                   |                               |                               |                                |                                 |                                  |                                               |                                  |                                         |                               |                                  |                                |                                          |                                           | 1                                   |                     |                                 |                                   |                                    | 1 |
| 41               | Witmer 2004        | Traditions of the heart                                                    |                                                    |                             |                                    |                                   |                               |                               |                                |                                 |                                  |                                               |                                  |                                         |                               |                                  |                                |                                          |                                           | 1                                   |                     |                                 |                                   |                                    | 1 |
| 42               | Pacheco 2014       | Web based smoking cessation program (including All Nations Breath of Life) |                                                    |                             |                                    |                                   |                               |                               | 1                              |                                 |                                  |                                               |                                  |                                         |                               |                                  |                                |                                          |                                           |                                     |                     |                                 |                                   |                                    | 1 |
| 43               | Bosma 2014         | Wiidookowishin (Help Me) program                                           |                                                    |                             |                                    |                                   |                               |                               |                                |                                 |                                  |                                               |                                  |                                         |                               |                                  |                                |                                          |                                           | 1                                   |                     |                                 |                                   |                                    | 1 |
| 44               | D'Silva 2011       | Wiidookowishin (Help Me) program                                           |                                                    |                             |                                    |                                   |                               |                               | 1                              |                                 |                                  |                                               |                                  |                                         |                               |                                  |                                |                                          |                                           | 1                                   |                     |                                 |                                   |                                    | 2 |

\*The two Cochrane reviews by Carson on smoking prevention [27, 28]; on smoking cessation [33, 34] appear to have been updated but, at the time of the search for this overview, were reported as conference abstracts only. Additional studies were included in these reviews (taking the total number of studies to N=6 and N=9 respectively) but no information was reported in the abstract to enable the studies to be identified. Hence the matrix shows only the original number of studies and these reviews were not included when calculating the mean number of references to included studies per review.

\*\* Number based on references in text; unable to confirm this covers all references for included studies. [18,19; 20]

\*\*\* Includes all references to included studies, irrespective of quality (only moderate and strong quality studies were included in the synthesis; weak studies were excluded) [32]

† This reference reports evaluations for multiple programs, hence has more than one entry in this table.

## References to studies included in reviews included in this Overview

### Studies in Australia

1. Finlay S: Aboriginal tobacco resistance tool kit, CEITC Indigenous Projects Register, viewed 29 September 2014, <[www.ceitc.org.au/aboriginal-tobacco-resistance-tool-kit](http://www.ceitc.org.au/aboriginal-tobacco-resistance-tool-kit)>. 2013.
2. Maddox R, Davey R, Cochrane T, Lovett R, van der Sterren A: Study protocol--Indigenous Australian social networks and the impact on smoking policy and programs in Australia: protocol for a mixed-method prospective study. *BMC public health* 2013, 13:879.
3. Tasmanian Aboriginal Centre Inc: Alcohol, tobacco and other drugs program (Tasmanian Aboriginal Centre), Programs and Projects, viewed 29 September 2014, <[www.healthinonet.ecu.edu.au/key-resources/programs-projects?pid=2352](http://www.healthinonet.ecu.edu.au/key-resources/programs-projects?pid=2352)>. 2014.
4. Shah S, Saunders J, Chang A, Gibson P, McGee J, McCallum G: Asthma and smoking prevention project, viewed 29 September 2014, <[www.menzies.edu.au/page/Research/Projects/Lungs/ASAP\\_-\\_Anti-Smoking\\_Asthma\\_Program\\_study](http://www.menzies.edu.au/page/Research/Projects/Lungs/ASAP_-_Anti-Smoking_Asthma_Program_study)>. 2013.
5. Lewis M: Beyond the big smoke, CEITC Indigenous Projects Register, viewed 29 September 2014, [www.ceitc.org.au/beyond-big-smoke](http://www.ceitc.org.au/beyond-big-smoke). 2006.
6. Australian Government Department of Health: Indigenous Anti-smoking campaign: Break the Chain. <[www.quitnow.gov.au/internet/quitnow/publishing.nsf/Content/btc-indsurvey-execsumm](http://www.quitnow.gov.au/internet/quitnow/publishing.nsf/Content/btc-indsurvey-execsumm)>. 2011.
7. Boyle T, Shepherd CCJ, Pearson G, Monteiro H, McAullay D, Economo K: Awareness and impact of the 'Bubblewrap' advertising campaign among Aboriginal smokers in Western Australia. *Tob Control* 2010, 19.
8. Cancer Council Western Australia: Bubblewrap campaign summary. <http://www.cancerwa.asn.au/resources/2009-MSH-Wave-19-2008-Bubblewrap-Campaign-Summary.pdf>. 2008.
9. Davison J: 'Butt busters' program, CEITC Indigenous Projects Register, viewed 29 September 2014, <[www.ceitc.org.au/butt-busters-program](http://www.ceitc.org.au/butt-busters-program)>. 2005.
10. Young D, Campbell S: Butt Out: Nicotine replacement therapy trial. In: Centre for Excellence in Indigenous Tobacco Control, National Indigenous Tobacco Control Research Workshop Report. Melbourne, Australia: Koorie Heritage Trust Inc; 2007.
11. Drug and Alcohol Services South Australia: Ceduna Day Centre, viewed 29 September 2014, <[www.healthinonet.ecu.edu.au/key-resources/programs-projects?pid=557](http://www.healthinonet.ecu.edu.au/key-resources/programs-projects?pid=557)>. 2014.
12. Sarin J, Graham F, Walker M: Clean air dreaming, CEITC Indigenous Projects Register, viewed 29 September 2014, <[www.ceitc.org.au/clean-air-dreaming](http://www.ceitc.org.au/clean-air-dreaming)>. 2007.
13. Clifford A, Parker R: Deadly Choices campaign evaluation: Final Report. Independent Evaluation undertaken by 'Pollinate' on behalf of IUIH. 2014.
14. Institute for Urban Indigenous Health: Deadly Choices Research and Evaluation. Bowen Hills; 2014.
15. Malseed C, Nelson A, Ware R, Lacey I, Lander K: Deadly Choices™ community health events: a health promotion initiative for urban Aboriginal and Torres Strait Islander people. *Aust J Prim Health* 2014, 20.
16. Malseed C, Nelson, A. and Ware, R.: Evaluation of a School-Based Health Education Program for Urban Indigenous Young People in Australia. *Health* 2014, 6:587-597.
17. Malseed C: Deadly choices health promotion initiative evaluation report January 1 -December 31, 2013: Institute for Urban Indigenous Health 2013.
18. Day G: Deadly Nungas say no to puiya! project. In: Oceania Tobacco Control Conference. Auckland, New Zealand; 2007.
19. Kickett D: Drug & alcohol awareness, CEITC Indigenous Projects Register, viewed 29 September 2014, <[www.ceitc.org.au/drug-alcohol-awareness](http://www.ceitc.org.au/drug-alcohol-awareness)>. 2009.
20. Minniecon S: Engaging an Aboriginal Elder in promoting tobacco control messages to the Aboriginal & Torres Strait Islander community project, CEITC Indigenous Projects Register,

- viewed 29 September 2014, <[www.ceitc.org.au/engaging-aboriginal-elder-promoting-tobacco-control-messages-aboriginal-torres-strait-islander-commu](http://www.ceitc.org.au/engaging-aboriginal-elder-promoting-tobacco-control-messages-aboriginal-torres-strait-islander-commu)>. 2005.
21. Cancer Council South Australia: Greater Aboriginal support from the NT Quitline, viewed 29 September 2014, <[www.cancersa.org.au/stay-up-to-date/press-releases/details/greater-aboriginal-support-from-the-nt-quitline](http://www.cancersa.org.au/stay-up-to-date/press-releases/details/greater-aboriginal-support-from-the-nt-quitline)>. 2014.
  22. Gould G, McGechan A, van der Zwan R: Give up the smokes: a smoking cessation program for Indigenous Australians, viewed 25 August 2014, <[www.ruralhealth.org.au/10thNRHC/10thnrhc.ruralhealth.org.au/papers/docs/Gould\\_Gillian\\_D9.pdf](http://www.ruralhealth.org.au/10thNRHC/10thnrhc.ruralhealth.org.au/papers/docs/Gould_Gillian_D9.pdf)>. In: 10th National Rural Health Conference. 2009.
  23. Gould G: Give up the smokes, CEITC Indigenous Projects Register, viewed 29 September 2014, <[www.ceitc.org.au/give-smokes](http://www.ceitc.org.au/give-smokes)>. 2006.
  24. Dean K: Gnumaries hurt program, CEITC Indigenous Projects Register, viewed 29 September 2014, <[www.ceitc.org.au/gnumaries-hurt-program](http://www.ceitc.org.au/gnumaries-hurt-program)>. 2010.
  25. Carson K: Improving health for Aboriginal people through tobacco related research, (NCT01735448), viewed 30 September 2014, <[clinicaltrials.gov/show/NCT01735448](http://clinicaltrials.gov/show/NCT01735448)>. 2012.
  26. Bailie R, Griffin J, Kelaher M, McNeair T, Percival N, Laycock A, Schierhout G: Sentinel Sites Evaluation: Final Report prepared for the Australian Government Department of Health and Ageing. In. Canberra: Menzies School of Health Research; 2013.
  27. KPMG: Monitoring and Evaluation of the Indigenous Chronic Disease Package Local Community Campaign (A3) measure. Final report prepared for the Australian Government Department of Health and Ageing. In.: KPMG; 2013.
  28. KPMG: Monitoring and Evaluation of the Indigenous Chronic Disease Package. Final Report prepared for the Australian Government Department of Health and Ageing. In., vol. 1: KPMG; 2013.
  29. Cargo M, Marks E, Brimblecombe J, Scarlett M, Maypilama E, Dhurrkay JG, Daniel M: Integrating an ecological approach into an Aboriginal community-based chronic disease prevention program: a longitudinal process evaluation. *BMC public health* 2011, 11:299.
  30. Larson A: Indigenous Healthy Lifestyle Program evaluation final report. Office of Aboriginal Health. In. Geraldton, W.A Combined Universities Centre for Rural Health; 2010.
  31. Harvey D, Tsey K, Cadet-James Y, Minniecon D, Ivers R, McCalman J: An evaluation of tobacco brief intervention training in three indigenous health care settings in north Queensland. *Aust N Z J Public Health* 2002, 26.
  32. Murphy A: Indigenous women's project, CEITC Indigenous Projects Register, viewed 29 September 2014, <[www.ceitc.org.au/indigenous-womens-project](http://www.ceitc.org.au/indigenous-womens-project)>. 2009.
  33. Hippi W: I-Quitt, CEITC Indigenous Projects Register, viewed 29 September 2014, <[www.ceitc.org.au/i-quit](http://www.ceitc.org.au/i-quit)>. 2009.
  34. Griffiths M: Justice health quit smoking project, CEITC Indigenous Projects Register, viewed 29 September 2014, <[www.ceitc.org.au/justice-health-quit-smoking-project](http://www.ceitc.org.au/justice-health-quit-smoking-project)>. 2009.
  35. Martinez A: Keep Koori kids smoke free, CEITC Indigenous Projects Register, viewed 29 September 2014, <[www.ceitc.org.au/keep-koori-kids-smoke-free](http://www.ceitc.org.au/keep-koori-kids-smoke-free)>. 2013.
  36. Aboriginal Health and Medical Research Council of New South Wales: Kick the habit social marketing campaign, Programs, viewed 29 September 2014 <[www.ahmrc.org.au/index.php?option=com\\_content&view=article&id=240:tobacco-resistance-and-control&catid=14:programs&Itemid=14](http://www.ahmrc.org.au/index.php?option=com_content&view=article&id=240:tobacco-resistance-and-control&catid=14:programs&Itemid=14)>. 2010.
  37. Adams K, Briggs V: Galnya Angin (good air) Partnerships in Indigenous Tobacco Control: Centre for Excellence in Indigenous Tobacco Control; 2005.
  38. Mark A, McLeod I, Booker J, Ardler C: Aboriginal Health Worker Smoking: A Barrier to Lower Community Smoking Rates? *Aboriginal and Islander Health Worker Journal* 2005, 29(5):[22]-[26].
  39. Mark A, McLeod I, Booker J, Ardler C: The Koori Tobacco Cessation Project. *Health Promotion Journal of Australia* 2004, 15(3):200-204.

40. Chapman L: Make smoking history, CEITC Indigenous Projects Register, viewed 29 September 2014, <[www.ceitc.org.au/make-smoking-history](http://www.ceitc.org.au/make-smoking-history)>. 2000.
41. Burgess P, McDonald J, Djabibba S, Namunurki S, Magaldagi L, Connors C, Matthews H, Thomas D: Smokebusters: Maningrida's experience implementing a tobacco control program. *The Chronicle* 2008, 11(4):8-10.
42. Johnston F, Beecham R, Dalgleish P, Malpraburr T, Gamarania G: The Maningrida "Be Smoke Free" project. *Health promotion journal of Australia : official journal of Australian Association of Health Promotion Professionals* 1998, 8.
43. Thomas D: Monitoring and evaluating Aboriginal tobacco control CEITC Indigenous Projects Register, viewed 29 September 2014, <[www.ceitc.org.au/monitoring-evaluating-aboriginal-tobacco-control](http://www.ceitc.org.au/monitoring-evaluating-aboriginal-tobacco-control)>. 2007.
44. Institute for Urban Indigenous Health: Murri places, smoke-free spaces, CEITC Indigenous Projects Register, viewed 29 September 2014, [www.ceitc.org.au/murri-places-smoke-free-spaces](http://www.ceitc.org.au/murri-places-smoke-free-spaces). 2011.
45. Dimer L: My heart my family our culture, CEITC Indigenous Projects Register, viewed 29 September 2014, <[www.ceitc.org.au/my-heart-my-family-our-culture](http://www.ceitc.org.au/my-heart-my-family-our-culture)>. 2004.
46. Ell P, Abel M, Pedic F: National Tobacco Campaign Formative Research. In.: GfK Australia; 2013.
47. National Tobacco Campaign: Australia's National Tobacco Campaign: Evaluation Report, Volume 1. In. Canberra: Commonwealth Department of Health and Aged Care; 1999: 252.
48. ORIMA: Evaluation of Burst 2 of the Quit for You Quit for Two campaign. Retrieved from the Quitline website: [http://quitnow.gov.au/internet/quitnow/publishing.nsf/Content/5235148D288A12FDCA257AA800149446/\\$File/NTC-MTA\\_Evaluation%20of%20Burst%20%20of%20QFYQF2%20-%20Final%20Report.docx](http://quitnow.gov.au/internet/quitnow/publishing.nsf/Content/5235148D288A12FDCA257AA800149446/$File/NTC-MTA_Evaluation%20of%20Burst%20%20of%20QFYQF2%20-%20Final%20Report.docx). 2013.
49. Adams K, Briggs V: Galnya Angin (good air) Partnerships in Indigenous Tobacco Control: Centre for Excellence in Indigenous Tobacco Control; 2005.
50. Webb C: No more boondah, CEITC Indigenous Projects Register, viewed 29 September 2014, <[www.ceitc.org.au/no-more-boondah](http://www.ceitc.org.au/no-more-boondah)>. 2012.
51. Bell J: No smokes project - summative evaluation report: findings from qualitative focus groups: Menzies School of Health Research; 2012.
52. Gould G: No smokes north coast, CEITC Indigenous Projects Register, viewed 29 September 2014, <[www.ceitc.org.au/no-smokes-north-coast](http://www.ceitc.org.au/no-smokes-north-coast)>. 2010.
53. Adams K, Walker H: Smokes and Aboriginal Health Worker Training. *Aboriginal and Islander Health Worker Journal* 2006, 30(2):15-16, 21.
54. Andrews B, Oates F, Naden P: Smoking among aboriginal health workers: findings of a 1995 survey in western New South Wales. *Aust N Z J Public Health* 1997, 21(7):789-791.
55. Bardsley P, Olekalns N: The impact of anti-smoking policies on tobacco consumption in Australia. *Health Promotion Journal of Australia* 1999, 9(3):202-205.
56. DiGiacomo M, Davidson PM, Davison J, Moore L, Abbott P: Stressful life events, resources, and access: key considerations in quitting smoking at an Aboriginal Medical Service. *Aust New Zeal J Publ Health* 2007, 31.
57. Douglas TA, Buettner PG, Whitehall J: Maternal awareness of sudden infant death syndrome in North Queensland, Australia: an analysis of infant care practices. *J Paediatr Child Health* 2001, 37(5):441-445.
58. Eades SJ, Sanson-Fisher RW, Wenitong M, Panaretto K, D'este C, Gilligan C: An intensive smoking intervention for pregnant Aboriginal and Torres Strait Islander women: a randomised controlled trial. *Med J Aust* 2012, 197.
59. Fairer Health Victoria: Case studies on improving health for all. Women's Health Goulburn North East website: [http://www.whealth.com.au/documents/health/kwhd\\_fairer\\_health.pdf](http://www.whealth.com.au/documents/health/kwhd_fairer_health.pdf). 2009.



60. Fletcher G, Fredericks B, Adams K, Finlay S, Andy S, Briggs L, Hall R: Having a yarn about smoking: using action research to develop a 'no smoking' policy within an Aboriginal Health Organisation. *Health Policy* 2011, 103(1):92-97.
61. Gilligan C, Sanson-Fisher RW, D'Este C, Eades S, Wenitong M: Knowledge and attitudes regarding smoking during pregnancy among Aboriginal and Torres Strait Islander women. *Med J Aust* 2009, 190(10):557-561.
62. Gilligan C: Aboriginal and Torres Strait Islander women: An examination of smoking during pregnancy: University of Newcastle; 2008.
63. Gray D, Sputore B, Walker J: Evaluation of an Aboriginal Health Promotion Program: A Case Study from Karalundi. In: *Indigenous Australian Alcohol and Other Drug Issues: Research from the National Drug Research Institute*. Edited by Gray D, Siggers S. Perth: National Drug Research Institute, Curtin University of Technology; 2002.
64. Heath DL, Panaretto K, Manassis V, Larkins S, Malouf P, Reilly E, Elston J: Factors to Consider in Smoking Interventions for Indigenous Women. *Australian Journal of Primary Health* 2006, 12(2):131-136.
65. Ivers RG, Farrington M, Burns CB, Bailie RS, D'Abbs PH, Richmond RL: A study of the use of free nicotine patches by Indigenous people. *Aust N Z J Public Health* 2003, 27.
66. Johnston V, Thomas DP: Smoking behaviours in a remote Australian Indigenous community: the influence of family and other factors. *Soc Sci Med* 2008, 67(11):1708-1716.
67. Johnston V, Thomas DP: What works in Indigenous tobacco control? The perceptions of remote Indigenous community members and health staff. *Health promotion journal of Australia : official journal of Australian Association of Health Promotion Professionals* 2010, 21(1):45-50.
68. Lindorff K: Tobacco: Time for Action. In. Canberra (AUST): National Aboriginal Community Controlled Health Organisation; 2002.
69. Panaretto K, Coutts J, Johnson L, Morgan A, Leon D, Hayman N: Evaluating performance of and organisational capacity to deliver brief interventions in Aboriginal and Torres Strait Islander medical services. *Aust N Z J Public Health* 2010, 34(1):38-44.
70. Pilkington AAG, Carter OBJ, Cameron AS, Thompson SC: Tobacco control practices among Aboriginal health professionals in Western Australia. *Australian Journal of Primary Health* 2009, 15(2):152-158.
71. Stewart HS, Bowden JA, Bayly MC, Sharplin GR, Durkin SJ, Miller CL, Givans SE, Warne CD, Wakefield MA: Potential effectiveness of specific anti-smoking mass media advertisements among Australian Indigenous smokers. *Health Education Research* 2011.
72. Thomas DP, Ferguson M, Johnston V, Brimblecombe J: Impact and perceptions of tobacco tax increase in remote Australian Aboriginal communities. *Nicotine & tobacco research : official journal of the Society for Research on Nicotine and Tobacco* 2013, 15.
73. Wakefield MA, Durkin S, Spittal MJ, Siahpush M, Scollo M, Simpson JA, Chapman S, White V, Hill D: Impact of Tobacco Control Policies and Mass Media Campaigns on Monthly Adult Smoking Prevalence. *American Journal of Public Health* 2008, 98(8):1443-1450.
74. West L, Young D, Lloyd J: Far North Queensland Aboriginal and Torres Strait Islander Health Workers; Knowledge, Attitudes & Beliefs about Smoking Cessation and Prevention. In. Brisbane (AUST); 1998.
75. Wilson G: What do Aboriginal women think is good antenatal care? Consultation report. Alice Springs, NT: Cooperative Research Centre for Aboriginal Health. Retrieved from [www.lowitja.org.au/lowitja-publishing/C015](http://www.lowitja.org.au/lowitja-publishing/C015). 2009.
76. Wood L, France K, Hunt K, Eades S, Slack-Smith L: Indigenous women and smoking during pregnancy: knowledge, cultural contexts and barriers to cessation. *Soc Sci Med* 2008, 66(11):2378-2389.
77. Gussy K: Our space smoke free, CEITC Indigenous Projects Register, viewed 29 September 2014, <[www.ceitc.org.au/our-space-smoke-free](http://www.ceitc.org.au/our-space-smoke-free)>. 2010.

78. Gould GS, McEwen A: An intensive smoking intervention for pregnant Aboriginal and Torres Strait Islander women: a randomized controlled trial. *Med J Aust* 2012, 197.
79. Aboriginal Health and Medical Research Council and Cancer Institute NSW: Qualitative Research Report- Quitline Enhancement Project. 2011.
80. Ford V: Reducing the risk of SIDS in Aboriginal communities, CEITC Indigenous Projects Register, viewed 29 September 2014, <[www.ceitc.org.au/reducing-risk-sids-aboriginal-communities](http://www.ceitc.org.au/reducing-risk-sids-aboriginal-communities)>. 2005.
81. Chamberlain C: Reducing smoking amongst pregnant Aboriginal women in Victoria: an holistic approach, CEITC Indigenous Projects Register, viewed 29 September 2014, <[www.ceitc.org.au/reducing-smoking-amongst-pregnant-aboriginal-women-victoria-holistic-approach](http://www.ceitc.org.au/reducing-smoking-amongst-pregnant-aboriginal-women-victoria-holistic-approach)>. 2008.
82. Coole J, Schultz A: Regional tackling smoking and healthy lifestyle workforce and activities, CEITC Indigenous Projects Register, viewed 29 September 2014, <[www.ceitc.org.au/regional-tackling-smoking-and-healthy-lifestyle-workforce-and-activities](http://www.ceitc.org.au/regional-tackling-smoking-and-healthy-lifestyle-workforce-and-activities)>. 2010.
83. Gentle I: Remote Aboriginal tobacco project, CEITC Indigenous Projects Register, viewed 29 September 2014, <[www.ceitc.org.au/remote-aboriginal-tobacco-project](http://www.ceitc.org.au/remote-aboriginal-tobacco-project)>. 2008.
84. Nunkuwarrin Yunti of South Australia Inc: Rewrite your story, viewed 29 September 2014, <[www.rewriteyourstory.com.au/about-us/the-campaign](http://www.rewriteyourstory.com.au/about-us/the-campaign)>. 2013.
85. Yarran C: Rockingham and Kwinana tobacco control project, CEITC Indigenous Projects Register, viewed 29 September 2014, <[www.ceitc.org.au/rockingham-and-kwinana-tobacco-control-project](http://www.ceitc.org.au/rockingham-and-kwinana-tobacco-control-project)>. 2010.
86. Adams K, Briggs V: Galnya Angin (good air) Partnerships in Indigenous Tobacco Control: Centre for Excellence in Indigenous Tobacco Control; 2005.
87. Adams K, Rumbiolo D, Charles S: Evaluation of Rumbalara's 'No More Dhonga' Short Course in Giving Up Smokes. *Aboriginal and Islander Health Worker Journal* 2006, 30(5):20-21.
88. Rumbalara Aboriginal Co-operative: Rumbalara quit program, CEITC Indigenous Projects Register, viewed 29 September 2014, <[www.ceitc.org.au/rumbalara-quit-program](http://www.ceitc.org.au/rumbalara-quit-program)>. 2012.
89. Healthway Western Australian State Government: The 'Say No to Smokes' project - Success stories campaign (WA), CEITC Indigenous Projects Register, viewed 29 September 2014, <[www.ceitc.org.au/say-no-smokes-project-success-stories-campaign-wa](http://www.ceitc.org.au/say-no-smokes-project-success-stories-campaign-wa)>. 2002.
90. Bond C: Smoke free life research project, CEITC Indigenous Projects Register, viewed 29 September 2014, <[www.ceitc.org.au/smoke-free-life-research-project](http://www.ceitc.org.au/smoke-free-life-research-project)>. 2012.
91. Carroll B: NSW SmokeCheck project, CEITC Indigenous Projects Register, viewed 29 September 2014, <[www.ceitc.org.au/nsw-smokecheck-project](http://www.ceitc.org.au/nsw-smokecheck-project)>. 2006.
92. Hearn S, Nancarrow H, Rose M, Massi L, Wise M, Conigrave K, Barnes I, Bauman A: Evaluating NSW SmokeCheck: a culturally specific smoking cessation training program for health professionals working in Aboriginal health. *Health promotion journal of Australia : official journal of Australian Association of Health Promotion Professionals* 2011, 22(3):189-195.
93. Jenkinson K: Smoke Check NT, CEITC Indigenous Projects Register, viewed 29 September 2014, <[www.ceitc.org.au/smoke-check-nt](http://www.ceitc.org.au/smoke-check-nt)>. 2007.
94. Queensland Health: SmokeCheck Evaluation Report 2006. In. Brisbane (AUST): State Government of Queensland; 2007.
95. Campbell S, Bohanna I, McKeown-Young D, Esterman A, Cadet-James Y, McDermott R: Evaluation of a community-based tobacco control intervention in five remote north Queensland Indigenous communities. *Int J Health Promot Educ* 2014, 52.
96. Aboriginal Health Council of SA: 'Puya Wiya' [No Smoking] 'Be Wise, Give Up': South Australian Aboriginal Tobacco Control Project. In. Adelaide (AUST): Aboriginal Health Council of SA,; 2002.
97. Stewart H: Puyu Wiya Smokecheck, CEITC Indigenous Projects Register, viewed 29 September 2014, <[www.ceitc.org.au/puyu-wiya-smokecheck](http://www.ceitc.org.au/puyu-wiya-smokecheck)>. 2011.

98. Quit SA: Smoke-free pregnancy project - Aboriginal women and their families, CEITC Indigenous Projects Register, viewed 29 September 2014, <[www.ceitc.org.au/smoke-free-pregnancy-project-aboriginal-women-and-their-families](http://www.ceitc.org.au/smoke-free-pregnancy-project-aboriginal-women-and-their-families)>. 2011.
99. Lynch T: Smokers program, CEITC Indigenous Projects Register, viewed 29 September 2014, <[www.ceitc.org.au/smokers-program](http://www.ceitc.org.au/smokers-program)>. 2005.
100. Ryan P: Smoking no good aye, CEITC Indigenous Projects Register, viewed 29 September 2014, <[www.ceitc.org.au/smoking-no-good-aye](http://www.ceitc.org.au/smoking-no-good-aye)>. 2010.
101. Daniel M: Smoking reduction strategy development and intervention among Aboriginal health workers, CEITC Indigenous Projects Register, viewed 29 September 2014, <[www.ceitc.org.au/smoking-reduction-strategy-development-and-intervention-among-aboriginal-health-workers](http://www.ceitc.org.au/smoking-reduction-strategy-development-and-intervention-among-aboriginal-health-workers)>. 2008.
102. Cosh S, Maksimovic L, Ettridge K, Copley D, Bowden JA: Aboriginal and Torres Strait Islander utilization of the Quitline service for smoking cessation in South Australia. *Aust J Prim Health* 2013, 19.
103. Johnston V, Thomas D, Westphal D, Earnshaw C: Starting to smoke: experiences of Indigenous youth, viewed 31 August 2014, <[www.lowitja.org.au/sites/default/files/docs/Starting%20to%20Smoke-FINALweb.pdf](http://www.lowitja.org.au/sites/default/files/docs/Starting%20to%20Smoke-FINALweb.pdf)>. 2013.
104. Passey M, Gale J, Holt B, Leatherday C, Roberts C, Kay D, Rogers L, Paden V: Stop smoking in its tracks: understanding smoking by rural Aboriginal women, viewed 29 September 2014, <[www.ruralhealth.org.au/10thNRHC/10thnrhc.ruralhealth.org.au/papers/docs/Passey\\_Megan\\_D9.pdf](http://www.ruralhealth.org.au/10thNRHC/10thnrhc.ruralhealth.org.au/papers/docs/Passey_Megan_D9.pdf)>. In: 10th National Rural Health Conference. Cairns, Australia; 2009.
105. Passey M: Supporting mums to quit: smoking intervention research for pregnant rural Aboriginal women. CEITC Indigenous Projects Register, viewed 29 September 2014, <[www.ceitc.org.au/supporting-mums-quit-smoking-intervention-research-pregnant-rural-aboriginal-women](http://www.ceitc.org.au/supporting-mums-quit-smoking-intervention-research-pregnant-rural-aboriginal-women)>. 2009.
106. Thomas D: Talking about the Smokes: preliminary findings from baseline survey. 2014.
107. Boadle M: Tasmanian Aboriginal tobacco control project, CEITC Indigenous Projects Register, viewed 29 September 2014, <[www.ceitc.org.au/tasmanian-aboriginal-tobacco-control-project](http://www.ceitc.org.au/tasmanian-aboriginal-tobacco-control-project)>. 2006.
108. Marley JV, Atkinson D, Kitaura T, Nelson C, Gray D, Metcalf S: The Be Our Ally Beat Smoking (BOABS) study, a randomised controlled trial of an intensive smoking cessation intervention in a remote Aboriginal Australian health care setting. *BMC public health* 2014, 14.
109. Marley JV, Kitaura T, Atkinson D, Metcalf S, Maguire GP, Gray D: Clinical trials in a remote Aboriginal setting: lessons from the BOABS smoking cessation study. *BMC public health* 2014, 14.
110. Ivers R, Castro A, Parfitt D, Bailie R, D'Abbs P, Richmond R: The tobacco project. Cooperative Research Centre for Aboriginal Health. [https://www.lowitja.org.au/sites/default/files/docs/The\\_Tobacco\\_Project.pdf](https://www.lowitja.org.au/sites/default/files/docs/The_Tobacco_Project.pdf) 2005.
111. Ivers RG, Castro A, Parfitt D, Bailie RS, D'Abbs PH, Richmond RL: Evaluation of a multi-component community tobacco intervention in three remote Australian Aboriginal communities. *Aust N Z J Public Health* 2006, 30.
112. Ivers R, Castro A, Parfitt D, Bailie RS, Richmond RL, D'Abbs PH: Television and delivery of health promotion programs to remote Aboriginal communities. *Health promotion journal of Australia : official journal of Australian Association of Health Promotion Professionals* 2005, 16.
113. Ivers RG, Castro A, Parfitt D, Bailie RS, Richmond RL, D'abbs PH: The role of remote community stores in reducing the harm resulting from tobacco to aboriginal people. *Drug Alcohol Rev* 2006, 25.
114. Thomas D, Johnston V, Fitz J: Lessons for Aboriginal tobacco control in remote communities: an evaluation of the Northern Territory 'Tobacco Project'. *Aust N Z J Public Health* 2010, 34.

115. Walley C, Sullivan D: The Western Australian Aboriginal smoking project. *Health Promotion Journal of Australia* 1998, 8:55-58.
116. Seibold M: Indigenous Tobacco Control Pilot Project: Process Evaluation, Workplace Policy Development Pilot, Phase One. Brisbane: Queensland Health. 2000.
117. Robertson J, Pointing BS, Stevenson L, Clough AR: We made the rule, we have to stick to it: towards effective management of environmental tobacco smoke in remote Australian Aboriginal communities. *Int J Environ Res Public Health* 2013, 10.
118. Robertson J: Top end tobacco project, CEITC Indigenous Projects Register, viewed 29 September 2014, <[www.ceitc.org.au/top-end-tobacco-project](http://www.ceitc.org.au/top-end-tobacco-project)>. 2007.
119. Robertson J: Sustainable Interventions to Address High Rates of Smoking Among Indigenous People in the Northern Territory's 'Top End': Project summary. In. Cairns (AUST): James Cook University; 2007.
120. Government of Victoria: Closing the Gap in Aboriginal Health Outcomes Initiative: Final Evaluation Report: URBIS; 2014.
121. Read V: WA prisons smoking reduction plan, CEITC Indigenous Projects Register, viewed 29 September 2014, [www.ceitc.org.au/wa-prisons-smoking-reduction-plan](http://www.ceitc.org.au/wa-prisons-smoking-reduction-plan)>. 2012.
122. Davis M: Yarning it up, CEITC Indigenous Projects Register, viewed 29 September 2014, <[www.ceitc.org.au/yarning-it](http://www.ceitc.org.au/yarning-it)>. 2013.
123. Ramamoorthi R: Healthy Starts (Te Piripohotanga), CEITC Indigenous Projects Register, viewed 29 September 2014, <[www.ceitc.org.au/healthy-starts-te-piripohotanga](http://www.ceitc.org.au/healthy-starts-te-piripohotanga)>. 2009.
124. Walker N, Johnston V, Glover M, Bullen C, Trenholme A, Chang A: Effect of a family-centered, secondhand smoke intervention to reduce respiratory illness in Indigenous infants in Australia and New Zealand: A randomized controlled trial. *Nicotine & tobacco research : official journal of the Society for Research on Nicotine and Tobacco* 2015, 17.

### **Studies in Canada**

1. Mashford-Pringle A: Early Learning for Aboriginal Children: Past, Present and Future and an Exploration of the Aboriginal Head Start Urban and Northern Communities Program in Ontario. *First Peoples Child & Family Review* 2012, 7.
2. Mashford-Pringle A: The impacts on health and education for children and families enrolled in Aboriginal Head Start Urban and Northern Communities in Ontario. University of Toronto; 2008.
3. Mitchell S: Tobacco cessation strategies for First Nations, Inuit and Metis: an environmental scan and annotated bibliography: National Collaborating Centre for Aboriginal Health; 2007.
4. Aboriginal Cancer Care Unit: A case study approach: lessons learned in Ontario – Aboriginal tobacco cessation. Cancer Care Ontario. 2008.
5. Inuit Tapiriit Kanatami: Blue Light Campaign Data Comparison. Government of Nunavut; 2011.
6. Hayward LM, Campbell HS, Sutherland-Brown C: Aboriginal users of Canadian quitlines: an exploratory analysis. *Tob Control* 2007, 16.
7. Wesche S, Ryan R, Carry C: First Nations, Inuit and Métis: respiratory health initiatives environmental scan: National Aboriginal Health Organization; 2011.
8. Baydala L, Sewlal B, Rasmussen C, Alexis K, Fletcher F, Letendre L, Odishaw J, Kennedy M, Kootenay B: A culturally adapted drug and alcohol abuse prevention program for Aboriginal children and youth. *Progress in Community Health Partnerships: Research, education and action* 2009, 3(1):37-46.
9. Irfan S, Schwartz R: Youth engagement and tobacco control in on-reserve Aboriginal communities: Ontario Tobacco Research Unit; 2012.
10. Wesche S, Ryan R, Carry C: First Nations, Inuit and Métis: respiratory health initiatives environmental scan: National Aboriginal Health Organization; 2011.

11. McKennitt DW, Currie CL: Does a culturally sensitive smoking prevention program reduce smoking intentions among Aboriginal children? A pilot study. *Am Indian Alsk Native Ment Health Res* 2012, 19(2):55-63.
12. Wesche S, Ryan R, Carry C: First Nations, Inuit and Métis: respiratory health initiatives environmental scan: National Aboriginal Health Organization; 2011.
13. Aboriginal Cancer Care Unit: A case study approach: lessons learned in Ontario – Aboriginal tobacco cessation. Cancer Care Ontario. 2008.
14. Chansonneuve D: Addictive behaviours among Aboriginal People in Canada: Aboriginal Healing Foundations; 2007.
15. Inuit Tobacco Free Network: Smoke stories: quit clips by Inuit youth video screening contest report Nunavut classrooms: National Aboriginal Health Organization; 2011.
16. Wesche S, Ryan R, Carry C: First Nations, Inuit and Métis: respiratory health initiatives environmental scan: National Aboriginal Health Organization; 2011.
17. Irfan S, Schwartz R, Bierre S: Engaging Aboriginal youth in off-reserve communities: a case study of MAKWA: Ontario Tobacco Research Unit; 2012.

### **Studies in Fiji**

1. Groth-Marnat G, Leslie S, Renneker M: Tobacco control in a traditional Fijian village: indigenous methods of smoking cessation and relapse prevention. *Soc Sci Med* 1996, 43.

### **Studies in New Zealand**

1. Maddison R, Roberts V, McRobbie H, Bullen C, Prapavessis H, Glover M, Jiang Y, Brown P, Leung W, Taylor S et al: Exercise counseling to enhance smoking cessation outcomes: the Fit2Quit randomized controlled trial. *Ann Behav Med* 2014, 48(2):194-204.
2. Fernandez C, Wilson D. Maori women's views on smoking cessation initiatives. *Nurs Prax N Z* 2008;24:27e40.
3. Grigg M, Waa A, Bradbrook SK: Response to an indigenous smoking cessation media campaign - it's about whanau. *Aust New Zeal J Publ Health* 2008, 32.
4. Wilson N, Grigg M, Graham L, Cameron G: The effectiveness of television advertising campaigns on generating calls to a national Quitline by Māori. *Tob Control* 2005, 14.
5. Glover M, Scragg R, Nosa V, Bullen C, McCool J, Kira A: Keeping Kids Smokefree: rationale, design, and implementation of a community, school, and family-based intervention to modify behaviors related to smoking among Maori and Pacific Island children in New Zealand. *Int Q Community Health Educ* 2009, 30(3):205-222.
6. Wilson N, Weerasekera D, Hoek J, et al. Smoker recognition of a national quitline number following introduction of improved pack warnings: ITC Project New Zealand. *Nicotine Tob Res* 2010;12(Suppl 1):S72e7.
7. Bullen C, Howe C, Lin RB, Grigg M, Laugesen M, McRobbie H, Glover M, Walker N, Wallace-Bell M, Whittaker R et al: Pre-cessation nicotine replacement therapy: pragmatic randomized trial. *Addiction* 2010, 105(8):1474-1483.
8. Watson D, Glover M, McCool J, Bullen C, Adams B, Min S: Impact of national smoke free environments laws on teachers, schools and early childhood centres. *Health promotion journal of Australia : official journal of Australian Association of Health Promotion Professionals* 2011, 22.
9. Cowie N, Glover M, Gentles D: Taxing times? Smoker response to tax increases. *Ethnicity and Inequalities in Health and Social Care* 2014, 7.

10. Glover M, Kira A, Walker N, Bauld L: Using incentives to encourage smoking abstinence among pregnant Indigenous women? A feasibility study. *Matern Child Health J* 2014.
11. Holt S, Timu-Parata C, Ryder-Lewis S, Weatherall M, Beasley R: Efficacy of bupropion in the indigenous Māori population in New Zealand. *Thorax* 2005, 60.
12. Walker N, Howe C, Bullen C, Grigg M, Glover M, McRobbie H, Rodgers A, Whittaker R: Does improved access and greater choice of nicotine replacement therapy affect smoking cessation success? Findings from a randomized controlled trial. *Addiction* 2011, 106:1176–1185.
13. Whittaker R, Dorey E, Bramley D, Bullen C, Denny S, Elley CR, Maddison R, McRobbie H, Parag V, Rodgers A et al: A theory-based video messaging mobile phone intervention for smoking cessation: randomized controlled trial. *J Med Internet Res* 2011, 13(1):e10.
14. Whittaker R, Maddison R, McRobbie H, Bullen C, Denny S, Dorey E, et al. A multimedia mobile phone-based youth smoking cessation intervention: findings from content development and piloting studies. *J Med Internet Res* 2008;10(5):e49
15. Hiscock R, Pearce J, Barnett R, Moon G, Daley V: Do smoking cessation programmes influence geographical inequalities in health? An evaluation of the impact of the PEGS programme in Christchurch, New Zealand. *Tob Control* 2009, 18.
16. Walker N, Howe C, Bullen C, Grigg M, Glover M, McRobbie H, Laugesen M, Parag V, Whittaker R: The combined effect of very low nicotine content cigarettes, used as an adjunct to usual Quitline care (nicotine replacement therapy and behavioural support), on smoking cessation: a randomized controlled trial. *Addiction* 2012, 107(10):1857-1867.
17. Bramley D, Riddell T, Whittaker R, Corbett T, Lin RB, Wills M: Smoking cessation using mobile phone text messaging is as effective in Māori as non-Māori. *N Z Med J* 2005, 118.
18. Rodgers A, Corbett T, Bramley D, Riddell T, Wills M, Lin RB, et al. Do u smoke after txt? Results of a randomised trial of smoking cessation using mobile phone text messaging. *Tob Control* 2005 Aug;14(4):255-261
19. Glover M, Kira A, Gentles D, Cowie N, Paton C, Moetara W: The WERO group stop smoking competition: main outcomes of a pre- and post- study. *BMC public health* 2014, 14:599.

### **Studies in Taiwan**

1. Lin MH, Huang SJ, Shih WM, Wany PY, Lin LH, Hsu HC: Effects of an anti-smoking program to prevent lung cancer among urban aboriginals in Taiwan. *Asian Pac J Cancer Prev* 2013, 14.

### **Studies in the United States of America**

1. Patten CA, Windsor RA, Renner CC, Enoch C, Hochreiter A, Nevak C: Feasibility of a tobacco cessation intervention for pregnant Alaska Native women. *Nicotine & tobacco research : official journal of the Society for Research on Nicotine and Tobacco* 2010, 12.
2. Patten CA: Tobacco cessation intervention during pregnancy among Alaska Native women. *J Cancer Educ* 2012, 27.
3. Boles M, Rohde K, He H, Maher JE, Stark MJ, Fenaughty A: Effectiveness of a tobacco quitline in an indigenous population: a comparison between Alaska Native people and other first-time quitline callers who set a quit date. *Int J Circumpolar Health* 2009, 68.
4. Choi WS, Faseru B, Beebe LA, Greiner AK, Yeh HW, Shireman T: Culturally-tailored smoking cessation for American Indians: study protocol for a randomized controlled trial. *Trials* 2011, 12.
5. Daley CM, Cowan P, Nollen NL, et al. Assessing the scientific accuracy, readability, and cultural appropriateness of a culturally targeted smoking cessation program for American Indians. *Health Promot Pract* 2009;10:386e93.

6. Makosky Daley C, Greiner A, Nazir N, Daley S, Solomon C, Braiuca S, Smith E, Choi W: All nations breath of life: Using community-based participatory research to address health disparities in cigarette smoking among American Indians. *Ethnicity and Disease* 2010, 20(4):334-338.
7. Horn K, Dino G, Manzo K, McCracken L, Noerachmanto N, McGloin T: Quit and reduction rates for a pilot study of the American Indian Not On Tobacco (NOT) Program. *Prev Chronic Dis* 2005, 2.
8. Nadeau M, Blake N, Poupart J, Rhodes K, Forster JL: Circles of Tobacco Wisdom: learning about traditional and commercial tobacco with Native elders. *Am J Prev Med* 2012, 43.
9. Schinke SP, Singer B, Cole K, Contento IR: Reducing cancer risk among Native American adolescents. *Prev Med* 1996, 25.
10. Johnson KM, Lando HA, Schmid LS, and Solberg LI: The GAINS project: outcome of smoking cessation strategies in four urban Native American clinics. *Giving American Indians no-smoking Strategies. Addict Behav* 1997, 22.
11. Weaver H, Jackson K: Healthy living in two worlds: testing a wellness curriculum for urban native youth. *Child Adolesc Soc Work J* 2010, 27.
12. Dixon AL, Yabiku ST, Okamoto SK, Tann SS, Marsiglia FF, Kulis S, Burke AM: The efficacy of a multicultural prevention intervention among urban American Indian youth in the southwest U.S. *J Prim Prev* 2007, 28(6):547-568.
13. Montgomery M, Manuelito B, Nass C, Chock T, Buchwald D: The Native comic book project: native youth making comics and healthy decisions. *J Cancer Educ* 2012, 27.
14. Beckham S, Washburn A, Ka'aha'aina D, Bradley S: Filling the void: a multi-component, culturally adapted smoking cessation program integrating Western and non-Western therapies. *Am J Health Educ* 2007, 38.
15. Bonevski B, Paul C, D'Este C, Sanson-Fisher R, West R, Girgis A, Siahpush M, Carter R: RCT of a client-centred, caseworker-delivered smoking cessation intervention for a socially disadvantaged population. *BMC public health* 2011, 11(1):70.
16. Doorenbos AZ, Jacobsen C, Corpuz R, et al. A Randomized controlled calendar mailout to increase cancer screening among urban American Indian and Alaska Native patients. *J Canc Educ* 2011;26:549e54.
17. Gilchrist LD, Schinke SP, Trimble JE, Cvetkovich GT: Skills enhancement to prevent substance abuse among American Indian adolescents. *Int J Addict* 1987, 22(9):869-879.
18. Hensel MR, Cavanagh T, Lanier AP, Gleason T, Bouwens B, Tanttila H: Quit rates at one year follow-up of Alaska Native Medical Center Tobacco Cessation Program. *Alaska Med* 1995, 37.
19. Mitschke DB, Loebl K, Tatafu E Jr, et al. Using drama to prevent teen smoking: development, implementation, and evaluation of crossroads in Hawai'i. *Health Promot Pract* 2010;11:244e8.
20. Moncher M, Schinke S: Group intervention to prevent tobacco use among Native American youth. *Res Soc Work Pract* 1994, 4.
21. Patten CA, Fadahunsi O, Hanza M, Smith CM, Hughes CA, Brockman TA: Development of a tobacco cessation intervention for Alaska Native youth. *Addiction Res Theor* 2013, 21.
22. Patten CA, Fadahunsi O, Hanza MM, Smith CA, Decker PA, Boyer R: Tobacco cessation treatment for Alaska Native adolescents: group randomized pilot trial. *Nicotine & tobacco research : official journal of the Society for Research on Nicotine and Tobacco* 2014, 16.
23. Schinke SP, Tepavac L, Cole KC: Preventing substance use among Native American youth: three-year results. *Addict Behav* 2000, 25.
24. Smith SS, Rouse LM, Caskey M, Fossum J, Strickland R, Culhane JK, Waukau J: Culturally-Tailored Smoking Cessation for Adult American Indian Smokers: A Clinical Trial. *Couns Psychol* 2014, 42(6):852-886.
25. Swartz LH, Noell JW, Schroeder SW, et al. A randomised control study of a fully automated internet based smoking cessation programme. *Tob Control* 2006;15:7e12.
26. Taulii M, Bush N, Bowen DJ, et al. Adaptation of a smoking cessation and prevention website for urban American Indian/Alaska Native youth. *J Cancer Educ* 2010;25:23e31.

27. Vogeltanz-Holm N, Holm J, White Plume J, et al. Confirmed recall and perceived effectiveness of tobacco counter marketing media in rural youth. *Prev Sci* 2009;10:325e34.
28. Weaver HN: Health concerns for Native American youth: a culturally grounded approach to health promotion. *J Hum Behav Soc Environ* 1999, 2.
29. Davis S, Cunningham-Sabo L: "Pathways to Health": A school-based cancer prevention project for Southwestern native American youth. In: *Preventing and controlling cancer in North America: A cross-cultural perspective*. Edited by Weiner D: Greenwood Publishing Group; 1999: 85-94.
30. Santos LA, Braun KL, Ae'a K, Shearer L: Institutionalizing a comprehensive tobacco-cessation protocol in an indigenous health system: lessons learned. *Prog Community Health Partnersh* 2008, 2.
31. Maher JE, Rohde K, Dent CW, Stark MJ, Pizacani B, Boysun MJ, Dilley JA, Yepassis-Zembrou PL: Is a statewide tobacco quitline an appropriate service for specific populations? *Tob Control* 2007, 16 Suppl 1:i65-70.
32. Richards J, Mousseau A: Community-based participatory research to improve preconception health among Northern Plains American Indian adolescent women. *Am Indian Alsk Native Ment Health Res* 2012, 19.
33. Choi WS, Daley CM, James A, et al. Beliefs and attitudes regarding smoking cessation among American Indians: a pilot study. *Ethn Dis* 2006;16:35e40.
34. Daley CM, James A, Barnoskie RS, et al. "Tobacco has a purpose, not just a past": feasibility of developing a culturally appropriate smoking cessation program for a pantribal native population. *Med Anthropol Q* 2006;20:421e40.
35. Bowen DJ, Nez Henderson P, Harvill J, Buchwald D: Short-term effects of a smoking prevention website in American Indian youth. *J Med Internet Res* 2012, 14.
36. Farmer J, Whitmore A, Cooper C: Health System Changes Lead to Educating and Referring More Smokers to Cessation Services. Sonoma County Indian Health Project; 2014.
37. Fenn DC, Beiergrohslain M, Ambrosio J: Southcentral Foundation tobacco cessation initiative. *Int J Circumpolar Health* 2007, 66.
38. Davis S, Lambert L, Gomez Y, Skipper B: Southwest cardiovascular curriculum project: study findings for American Indian elementary students. *Journal of Health Education* 1995, 26(2):S72-81.
39. Schinke SP, Moncher MS, Singer BR: Native American youths and cancer risk reduction. Effects of software intervention. *J Adolesc Health* 1994, 15.
40. Johnson KW, Shamblen SR, Ogilvie KA, Collins D, Saylor B: Preventing youths<sup>TM</sup> use of inhalants and other harmful legal products in frontier Alaskan communities: a randomized trial. *Prev Sci* 2009, 10.
41. Witmer JM, Hensel MR, Holck PS, Ammerman AS, Will JC: Heart disease prevention for Alaska Native women: a review of pilot study findings. *J Womens Health* 2004, 13.
42. Pacheco J: Web-based smoking cessation program for tribal college students. In. *ClinicalTrials.gov*; 2014.
43. Bosma LM, D'Silva J, Jansen A, Sandman NR, Hink RL: The Wiidookowishin program: results from a qualitative process evaluation of a culturally tailored commercial tobacco cessation program. *Am Indian Alsk Native Ment Health Res* 2014, 21.
44. D'Silva J, Schillo BA, Sandman NR, Leonard TL, Boyle RG: Evaluation of a tailored approach for tobacco dependence treatment for American Indians. *Am J Health Promot* 2011, 25.
